# Supplementary material
Source: HighWire-hosted journal article supplement (https://www.cmajopen.ca/highwire/filestream/81118/field_highwire_adjunct_files/0/2018-0020-1-at.pdf)
Supplement: 2018-0020-1-at.pdf [file 2018-0020-1-at.pdf]

## Appendix 1 (as supplied by the authors): Supplementary tables

**Supplementary Table A1:** Patient characteristics and auxological data at baseline for growth hormone-treated children, by primary diagnostic category (all patients with known diagnosis and baseline height standard deviation score available)

### a) Canada

|                                        | OGHD                   | IGHD                   | Turner syndrome        | Idiopathic short stature | Small for gestational age |
|----------------------------------------|------------------------|------------------------|------------------------|--------------------------|---------------------------|
| Number of patients                     | n=310                  | n=125                  | n=148                  | n=33                     | n=17                      |
| Males (%)                              | 68.1%                  | 69.6%                  | –                      | 84.8%                    | 41.2%                     |
| Age (years)                            | 7.2 (6.7 to 7.7)       | 10.0 (9.1 to 10.8)     | 9.3 (8.7 to 9.8)       | 12.2 (11.1 to 13.2)      | 6.6 (4.6 to 8.5)          |
| Height SDS                             | –2.27 (–2.44 to –2.10) | –2.67 (–2.88 to –2.46) | –2.93 (–3.05 to –2.80) | –2.67 (–2.98 to –2.37)   | –3.81 (–4.44 to –3.18)    |
| Height velocity (cm/year)              | 5.18 (4.61 to 5.75)    | 4.80 (4.27 to 5.33)    | 4.61 (4.19 to 5.03)    | 4.91 (4.26 to 5.56)      | 7.77 (5.74 to 9.81)       |
| Height velocity SDS                    | –1.79 (–2.03 to –1.54) | –1.29 (–1.58 to –1.01) | –1.20 (–1.56 to –0.83) | –0.35 (–1.16 to 0.46)    | 0.03 (–1.15 to 1.20)      |
| Target height SDS                      | 0.04 (–0.07 to 0.14)   | –0.41 (–0.58 to –0.24) | –0.03 (–0.17 to 0.10)  | –0.57 (–0.84 to –0.30)   | –0.28 (–0.55 to 0.00)     |
| Target height SDS deficit <sup>a</sup> | –2.45 (–2.65 to –2.26) | –2.27 (–2.53 to –2.00) | –2.92 (–3.07 to –2.77) | –2.08 (–2.43 to –1.74)   | –3.44 (–4.10 to –2.79)    |
| Stimulated peak GH (µg/l)              | 3.3 (2.7 to 4.0)       | 4.6 (3.9 to 5.3)       | NA                     | 24.1 (17.8 to 30.5)      | NA                        |
| GH dose (mg/kg/week)                   | 0.18 (0.18 to 0.19)    | 0.19 (0.18 to 0.20)    | 0.29 (0.28 to 0.29)    | 0.23 (0.21 to 0.25)      | 0.23 0.20 to 0.26)        |

### b) All countries combined (including Canada)

|                           | OGHD                   | IGHD                   | Turner syndrome        | Idiopathic short stature | Small for gestational age |
|---------------------------|------------------------|------------------------|------------------------|--------------------------|---------------------------|
| Number of patients        | n=2508                 | n=10189                | n=1712                 | n=2657                   | n=1209                    |
| Males (%)                 | 65.5%                  | 67.6%                  | –                      | 71.9%                    | 54.7%                     |
| Age (years)               | 8.2 (8.0 to 8.3)       | 10.1 (10.0 to 10.2)    | 8.8 (8.6 to 9.0)       | 11.3 (11.1 to 11.4)      | 8.2 (8.0 to 8.4)          |
| Height SDS                | –2.42 (–2.48 to –2.36) | –2.41 (–2.43 to –2.40) | –2.60 (–2.65 to –2.56) | –2.41 (–2.44 to –2.38)   | –2.68 (–2.73 to –2.63)    |
| Height velocity (cm/year) | 4.72 (4.55 to 4.90)    | 4.71 (4.66 to 4.77)    | 4.99 (4.82 to 5.16)    | 4.82 (4.71 to 4.93)      | 5.42 (5.24 to 5.60)       |

|                                        |                        |                        |                        |                        |                        |
|----------------------------------------|------------------------|------------------------|------------------------|------------------------|------------------------|
| Height velocity SDS                    | -1.61 (-1.72 to -1.51) | -1.03 (-1.07 to -0.98) | -1.14 (-1.26 to -1.02) | -0.77 (-0.86 to -0.69) | -0.84 (-0.97 to -0.72) |
| Target height SDS                      | -0.06 (-0.10 to -0.02) | -0.55 (-0.57 to -0.53) | 0.02 (-0.03 to 0.06)   | -0.55 (-0.58 to -0.52) | -0.62 (-0.67 to -0.57) |
| Target height SDS deficit <sup>a</sup> | -2.43 (-2.49 to -2.36) | -1.86 (-1.88 to -1.84) | -2.61 (-2.67 to -2.56) | -1.86 (-1.90 to -1.82) | -2.06 (-2.13 to -1.99) |
| Stimulated peak GH (µg/l)              | 4.2 (4.0 to 4.4)       | 8.2 (8.0 to 8.3)       | NA                     | 16.8 (16.4 to 17.2)    | NA                     |
| GH dose (mg/kg/week)                   | 0.23 (0.22 to 0.23)    | 0.25 (0.25 to 0.25)    | 0.32 (0.31 to 0.32)    | 0.33 (0.33 to 0.34)    | 0.28 (0.28 to 0.29)    |

Note: GH = growth hormone, IGHD = idiopathic growth hormone deficiency, NA = data available for <60% of patients, OGHD = organic growth hormone deficiency,

SDS = standard deviation score.

Data show mean (95% confidence intervals); patient numbers are for those with height SDS at baseline and 1-year, but not all patients had all other information.

<sup>a</sup>Height SDS minus target height SDS.

**Supplementary Table A2:** Cause of death and characteristics of growth hormone-treated patients who died during study, grouped by primary diagnosis of growth disorder

| Diagnostic group<br>Primary diagnosis           | Sex    | Age<br>(years) | Time from GH<br>start (years) | GH duration<br>(years) | Cause of death              | Probably or<br>possibly related |
|-------------------------------------------------|--------|----------------|-------------------------------|------------------------|-----------------------------|---------------------------------|
| OGHD                                            |        |                |                               |                        |                             |                                 |
| Acute lymphoblastic leukemia                    | Male   | 12             | 4.8                           | 4.3                    | Cerebral neuroblastoma      | No                              |
| Astrocytoma                                     | Male   | 9              | 3.3                           | 0.3                    | Astrocytoma recurrence      | No                              |
| Astrocytoma                                     | Male   | 15             | 6.4                           | 6.2                    | Astrocytoma recurrence      | Yes                             |
| Medulloblastoma                                 | Male   | 11             | 3.7                           | 3.3                    | Medulloblastoma recurrence  | Yes                             |
| Medulloblastoma                                 | Male   | 12             | 1.4                           | 1.5                    | Medulloblastoma recurrence  | Yes                             |
| Hypopituitarism                                 | Male   | 0.6            | 0.2                           | 0.2                    | Cardiorespiratory arrest    | No                              |
| Septo-optic dysplasia and hypopituitarism       | Male   | 1.9            | 1.5                           | 1.5                    | Gastrointestinal hemorrhage | No                              |
| Turner syndrome                                 |        |                |                               |                        |                             |                                 |
| Turner syndrome                                 | Female | 16             | 9.8                           | 5.5                    | Metastatic Ewing sarcoma    | No                              |
| Other                                           |        |                |                               |                        |                             |                                 |
| Chronic renal insufficiency and Down syndrome   | Male   | 3              | 1.7                           | 1.7                    | Cardiorespiratory arrest    | No                              |
| Duchenne muscular dystrophy                     | Male   | 15             | 0.2                           | 0.2                    | Cardiac arrest              | No                              |
| Pseudohypoparathyroidism and panhypopituitarism | Male   | 11             | 10.7                          | 10.7                   | Pneumonia                   | No                              |

Note: GH = growth hormone, OGHD = organic growth hormone deficiency.
